# Supplementary material for: Synthesis of a highly conductive coordination polymer film via a vapor–solid phase chemical conversion process
Source: Royal Society of Chemistry journal article supplement (doi:10.1039/d4cc02433h), 2024-01-01
Supplement: d4cc02433h1.pdf [file d4cc02433h1.pdf]

*Electronic Supplementary Information (ESI)*

## **Synthesis of a highly conductive coordination polymers film via a vapor-solid phase chemical conversion process**

Ze Li,<sup>ab</sup> Yigang Jin,<sup>ab</sup> Chunlei Li,<sup>bc</sup> Zixin Chang,<sup>ab</sup> Sha Wu,<sup>ab</sup> Yimeng Sun,<sup>a</sup> Lang Jiang,<sup>c</sup> and Wei Xu<sup>\*ab</sup>

*a. Beijing National Laboratory for Molecular Sciences, Key Laboratory of Organic Solids, Institute of Chemistry, Chinese Academy of Sciences, Beijing 100190, China. E-mail: wxu@iccas.ac.cn.*

*b. University of Chinese Academy of Sciences, Beijing 100049, China.*

*c. Key Laboratory of Organic Solids, Institute of Chemistry, Chinese Academy of Sciences, Beijing 100190, China. E-mail: ljiang@iccas.ac.cn.*

### **Materials**

Hexakis(benzylthio)benzene ( $C_6(SCH_2Ph)_6$ ) was purchased from Linyi Technology Co. Ltd.  $Ag_2O$  was purchased from Acros Organics Co. Water was purified using the Milli-Q purification system. The solvents were degassed by the Freeze-Thaw method before using. Benzenehexathiol was synthesized according to the previous literature<sup>1</sup>

### **Synthesis of $Ag_5BHT$ powder.**

The powder sample of  $Ag_5BHT$  was synthesized via a simple inhomogeneous solution reaction of  $Ag_2O$  and  $H_6BHT$ <sup>(21)</sup>. In an argon atmosphere,  $H_6BHT$  (27 mg, 0.1 mmol) and silver oxide ( $Ag_2O$ ) (58 mg, 0.25 mmol) were suspended in degassed isopropanol (40mL). The mixture was ultrasonic dispersed at 0 °C for 10 min, and then heated to 50 °C and reacted overnight. After stirring for 24 hours and the suspension will turn dark green. A dark green powder was obtained by filtration and washed three times with water, methanol and acetone, respectively. And the solvents were removed under vacuum. The yield of  $Ag_5BHT$  was 79mg (98%)

### **Synthesis of $Ag_5BHT$ films.**

Firstly, an inert substrate was coated with Ag films through thermal evaporation; subsequently, a high-quality flat  $Ag_2O$  films were achieved through plasma oxidation. Then,  $H_6BHT$  was deposited onto the surface of the  $Ag_2O$  films using thermal evaporation technique at a ratio of 1.3:1 relative to the thickness of  $Ag_2O$  films. The resulting  $Ag_2O$ - $H_6BHT$  films were placed within a closed container filled with an atmosphere containing vaporized isopropanol. This setup undergone heating at temperatures ranging from 90-120 °C for several days to yield  $Ag_5BHT$  thin films. The time largely depended on both the thickness of the  $Ag_2O$  films and  $H_6BHT$  films; increasing these parameters will correspondingly increase reaction time duration. For instance, when using  $Ag_2O$  films with thickness of 50nm combined with  $H_6BHT$  films with thickness of 65nm, it takes approximately two days for completion, whereas employing  $Ag_2O$  films (100nm) along with  $H_6BHT$  films(130nm) extends this duration to five days.

### **Device Fabrication.**

The heavily doped n-type Si wafers with a 300 nm thick  $SiO_2$  layer were used as substrates of OFETs, which were cleaned with deionized water, piranha solution (70/30 vol./vol.  $H_2SO_4/H_2O_2$ ), deionized water, isopropanol and blow-dried by  $N_2$ . Evaporating 100 nm thick Au or Pt source and drain electrodes onto a  $SiO_2/Si / Ag_5BHT$  films to fabricate the bottom-gate top-contact devices.

### **Characterization.**

**Thermogravimetric analysis.** TGA date was performed on a PerkinElmer TGA 8000 instrument under nitrogen atmosphere.

**X-ray characterization.** Experimental PXRD data was collected on a PANalytical Empyrean II X-Ray diffractometer using Cu Ka irradiation ( $\lambda=1.5406 \text{ \AA}$ ). The generator was operated at 40 kV and 40 mA. Samples were scanned at diffraction angles ranging between  $2^\circ$  and  $60^\circ$  at a scanning rate of  $0.026^\circ/\text{s}$ .

**SEM and TEM Characterizations.** The SEM and EDS images were obtained using a Toshiba SU8000-SEM with an acceleration voltage of 10 kV. The TEM images and HR-TEM images and SAED patterns were obtained by using a JEOL 2100F TEM with an accelerated voltage of 120 kV.

**The step profiler tests.** The data was performed on a Bruker DektakXT. The Scan type was Standard Scan, scan duration was 6s, scan length was  $300\mu\text{m}$ , and scan resolution was  $0.166482 \mu\text{m}$ .

**The X-ray photon spectrum (XPS) characterizations.** XPS was performed with a monochromatic magnesium Ka source (1253.8 eV) using AXIS Ultra-DLD ultrahigh vacuum photoemission spectroscopy system (Kratos Co.).

**The Fourier transform infrared (FT-IR) spectroscopy characterizations.** The spectra data was collected on VERTEX 70v vacuum micro-Fourier infrared spectrometer.

**Electrical property measurement.** The electrical conductivities were measured via a four-probe method by using a KEITHLEY 2002 Multimeter (Keithley Instrument Inc.). The temperature of measurement environment for electrical conductivity was controlled by a CTI Cryogenics refrigerator. The films were connected with four probes by conductive silver paste.

**Characterizations of field-effect transistors (FETs).** The device characteristics were measured at room temperature by Agilent 1500A. The mobility was calculated in the linear regime from the equation  $I_{DS} = (W\mu C_i/L)(V_{GS}-V_T)V_{DS}$ , where  $I_{DS}$  is the drain-source current,  $\mu$  is the field-effect mobility,  $W$  and  $L$  are the channel width and length, respectively,  $C_i$  is the capacitance per unit of the dielectric layer,  $V_T$  is the threshold voltage, and  $V_{GS}$  and  $V_{DS}$  are the gate voltage and drain-source voltage, respectively.

## Results and Discussion

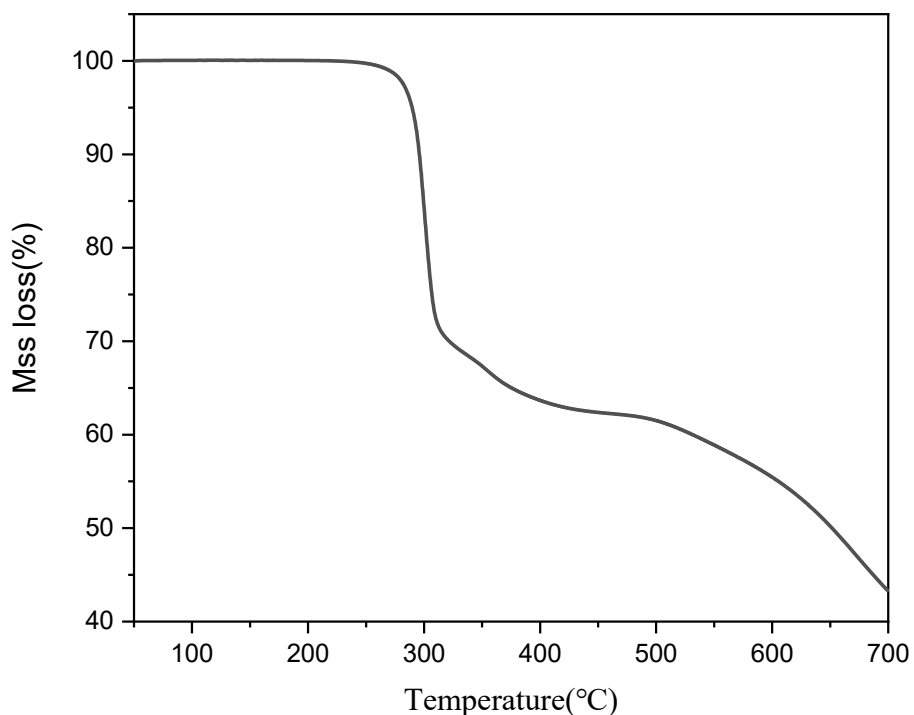

**Fig. S1** TGA profile of H<sub>6</sub>BHT under nitrogen atmosphere showing that it is stable at the sublimation temperature range.

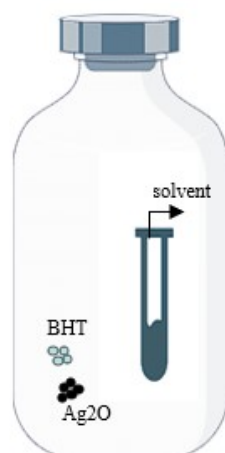

**Fig. S2** Schematic of a reaction performed by heating Ag<sub>2</sub>O powder and H<sub>6</sub>BHT powder in a closed reaction bottle filled with isopropanol vapor atmosphere.

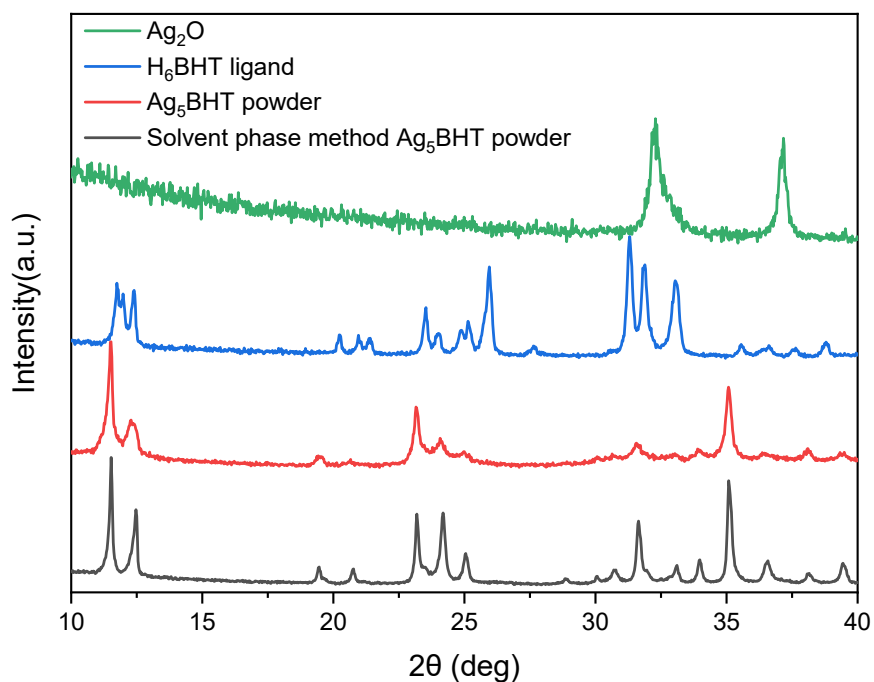

**Fig. S3** PXRD pattern of solvent phase method-Ag<sub>5</sub>BHT powder (black) and crystalline Ag<sub>5</sub>BHT powder prepared by the vapor-solid phase chemical conversion method (red) and H<sub>6</sub>BHT ligand (blue) and Ag<sub>2</sub>O (green).

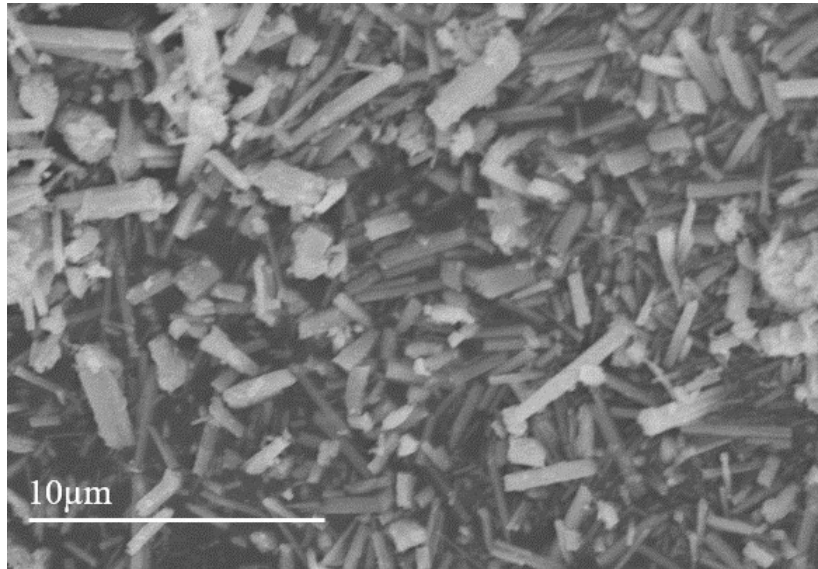

**Fig. S4** SEM images of crystalline  $\text{Ag}_5\text{BHT}$  powder prepared by the vapor-solid phase chemical conversion method.

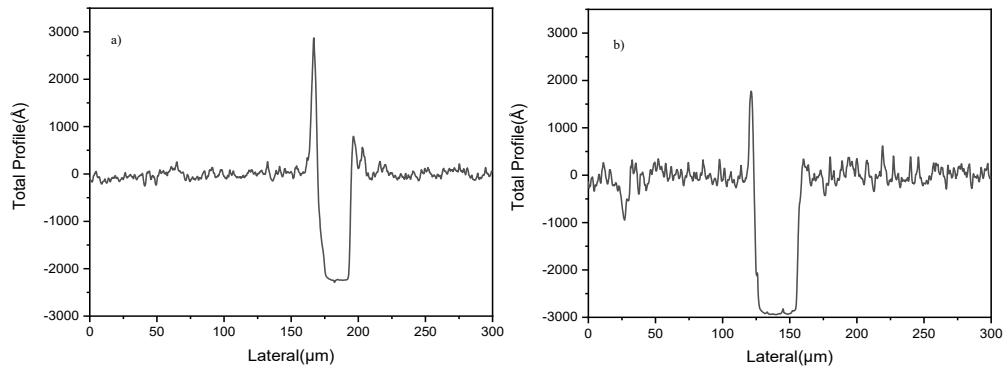

**Fig. S5** The step profiler test results before and after reaction between 100nm  $\text{Ag}_2\text{O}$  and 130nm  $\text{H}_6\text{BHT}$  films. a)  $\text{Ag}_2\text{O}/\text{H}_6\text{BHT}$  films before reaction b)  $\text{Ag}_5\text{BHT}$  thin films after reaction.

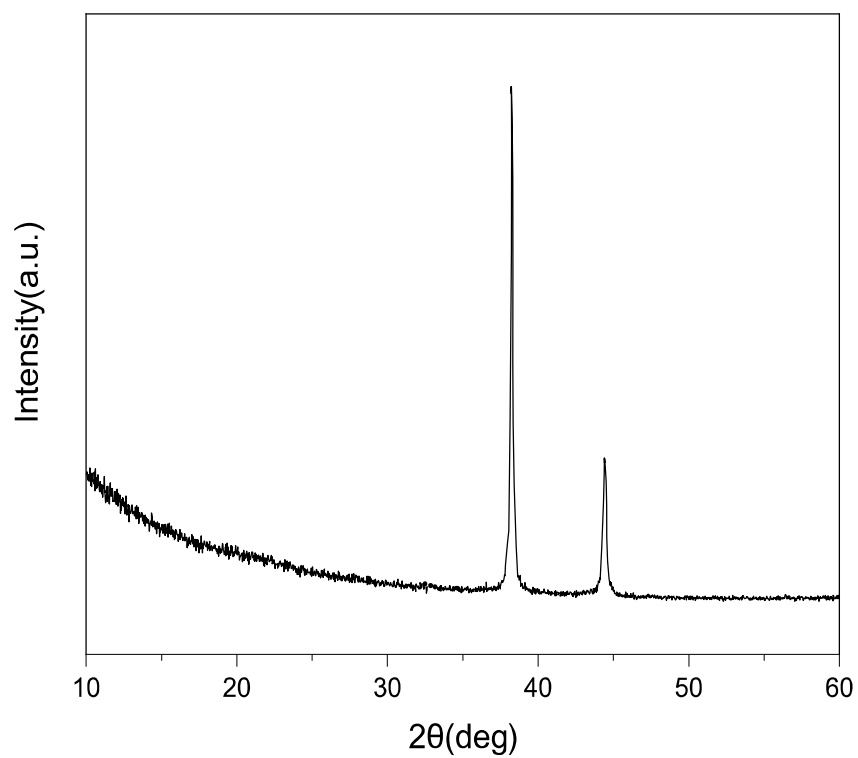

**Fig. S6** PXRD pattern of  $\text{Ag}_2\text{O}$  films reduced to Ag films.

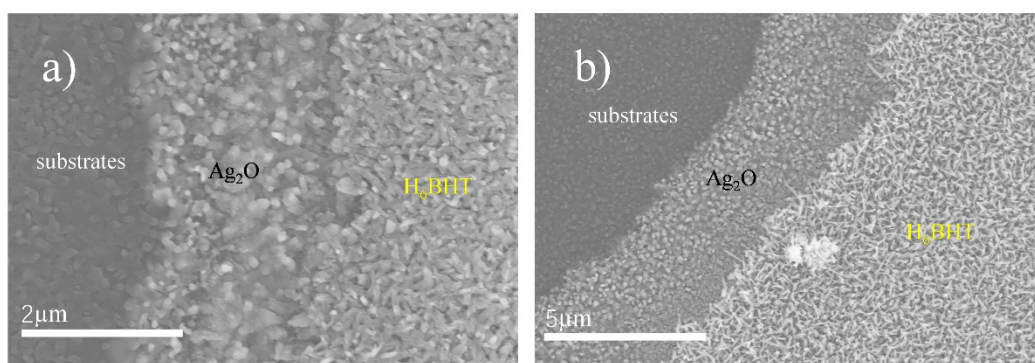

**Fig. S7** SEM images of the  $\text{Ag}_2\text{O}/\text{H}_6\text{BHT}$  films.

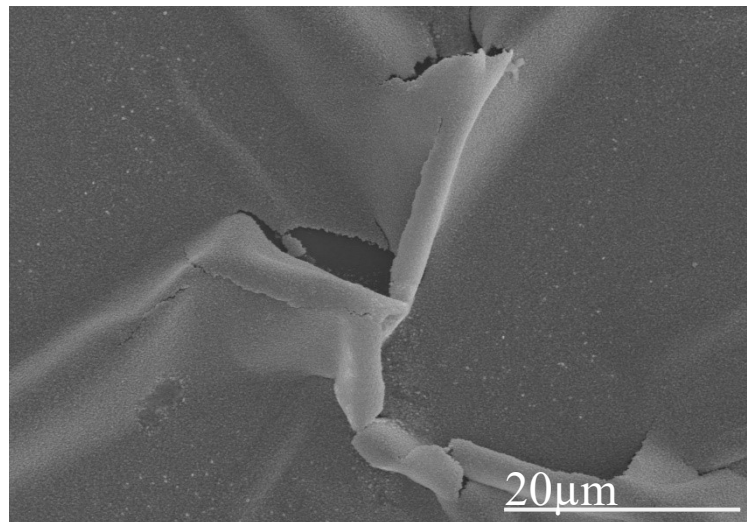

Fig. S8 SEM images of the fold of Ag<sub>5</sub>BHT thin films.

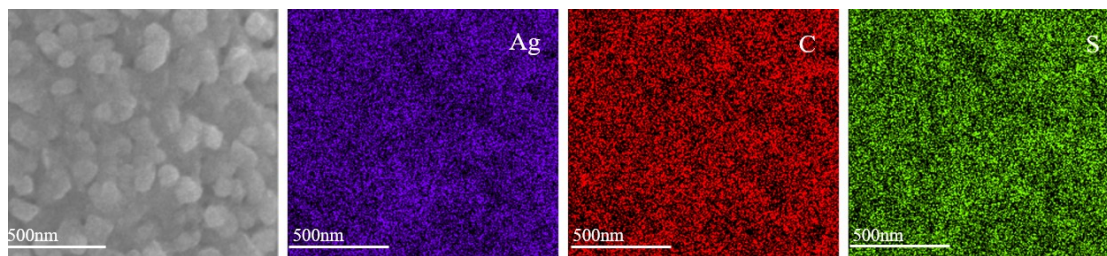

Fig. S9 SEM and the corresponding EDS mapping images of Ag<sub>5</sub>BHT thin films.

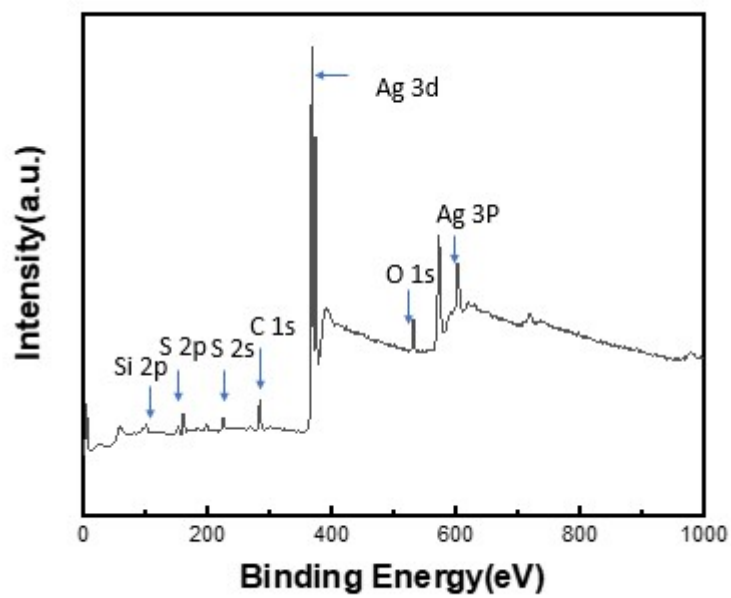

Fig. S10 The full XPS spectrum of Ag<sub>5</sub>BHT thin films.

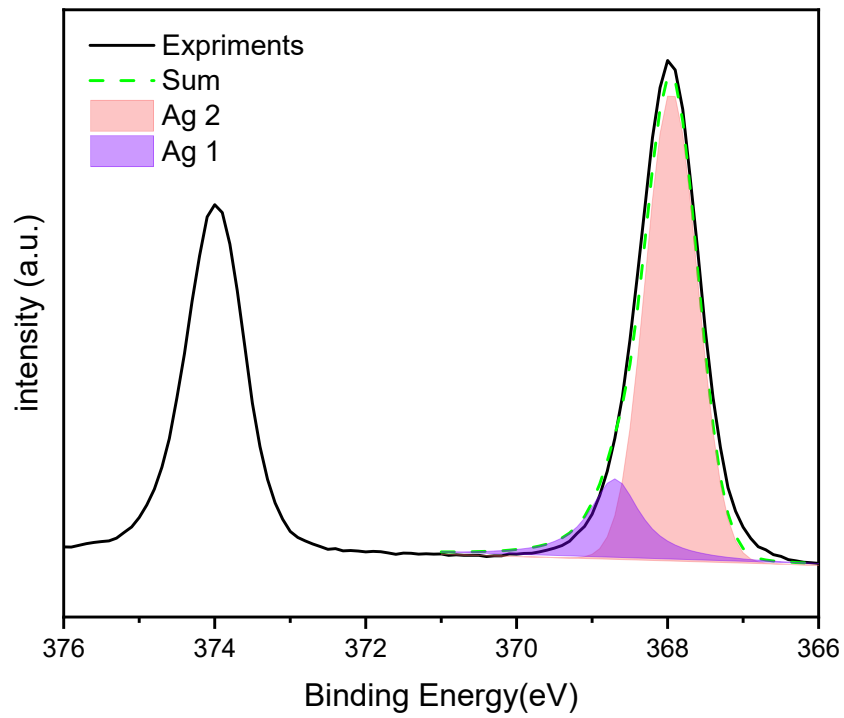

**Fig. S11** The XPS of Ag<sub>5</sub>BHT thin films focusing on Ag 3d region.

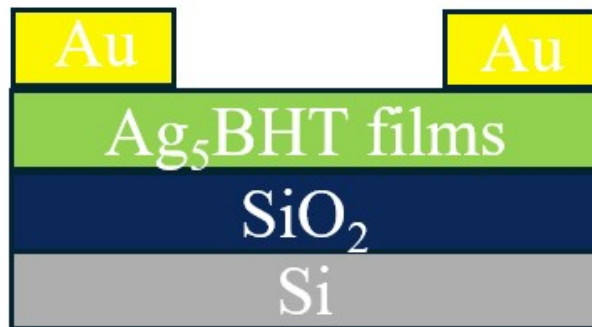

**Fig. S12** Illustrative schematic of Ag<sub>5</sub>BHT films-based field-effect transistors.

|                        | 1      | 2      | 3      | average value |
|------------------------|--------|--------|--------|---------------|
| <b>S/Ag atom ratio</b> | 1.41:1 | 1.58:1 | 1.66:1 | 1.55:1        |

**Table S1.** S/Ag atomic ratio calculated from EDS data.

**Supplementary Reference**

1. H. K. Yip, A. Schier, J. Riede, H. Schmidbaur, *Journal of the Chemical Society, Dalton Transactions* 1994, 2333-2334.
